# Supplementary material for: RNAseq profiling of circRNA expression in radiation-treated A549 cells and bioinformatics analysis of radiation-related circRNA-miRNA networks
Source: PubMed Central journal article supplement — Oncol Lett. 2020 Jun 5;20(2):1557–66. doi: 10.3892/ol.2020.11698 (PMC7377113; doi:10.3892/ol.2020.11698), 2020-06-05
Supplement: Supplementary_Data.pdf [file Supplementary_Data.pdf]

Figure S1. Cell Counting Kit-8 assay was performed to determine the radiosensitivity of A549 cells at various doses (0, 2, 4 and 8 Gy) of radiation for 24 or 48 h. \*P<0.05, two-tailed Student's t-test

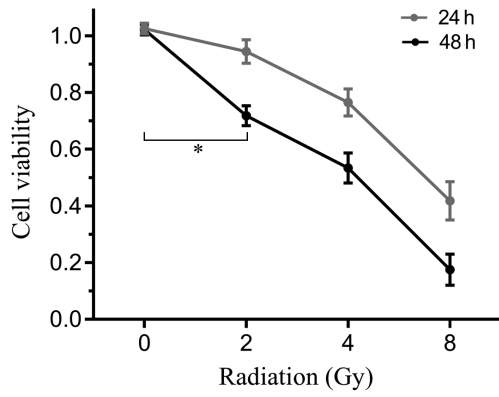

Table SI. Sequences of the primers used for reverse transcription-quantitative PCR.

| Gene             | Forward primer, 5' to 3'  | Reverse primer, 5' to 3' | Variation tendency |
|------------------|---------------------------|--------------------------|--------------------|
| $\beta$ -actin   | CCTGGCACCCAGCACAAT        | GGGCCGGACTCGTCATAC       |                    |
| hsa_circ_0003187 | AAAACACCATCCGGACCACG      | TTCGGTTTTCTCTCGCCCGA     | Upregulated        |
| hsa_circ_0002174 | AGGGGTCAGTGGTGGAAAGTG     | CTTCCTAGTGCTGAGGCCCC     | Upregulated        |
| hsa_circ_0070039 | TGGGAGGAAACCAGACCCTT      | TGCCTGTGTTAGTTGGGGCA     | Upregulated        |
| hsa_circ_0004270 | TCCATGGCTGGAGCAACTGC      | TCCAGTCCACTGTCATTGTCCC   | Upregulated        |
| hsa_circ_0005591 | TGTTCTTGAAGCATATCTGACAGGT | TGAAGAAGCCAGTGGAGCACT    | Upregulated        |
| hsa_circ_0001009 | GCACTACCTCCTCCTCCCCA      | TTGTTCTCAGCTGCCAACTACA   | Downregulated      |
| hsa_circ_0004815 | TATGAGGCGGGATCCACAGC      | GCAGTGGTGGTTTTCTTTGGCA   | Downregulated      |
| hsa_circ_0096360 | AGTCCGTGGATGAAGGTGGG      | CTGCAGGACCACCGTCTTCT     | Downregulated      |
| hsa_circ_0036627 | GCTGCACGCATTTTCGGAAGA     | GGGCGCCTCAATTGTCATGG     | Downregulated      |
| hsa_circ_0004524 | AGCCGAGCAGCCAATCAAGA      | CTGGGGTTTAGGGGCTACCG     | Downregulated      |
